# Supplementary material
Source: Springer Nature journal article supplement (https://www.springermedizin.de/resource/supplementary/12881_2009_594_MOESM2_ESM.pdf/9451020)

**Family 1 (UAE/Yemini)**

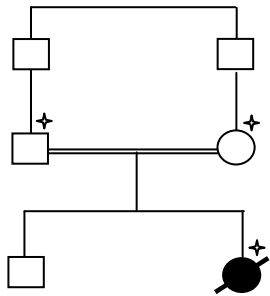

**Family 2 (Sudanese)**

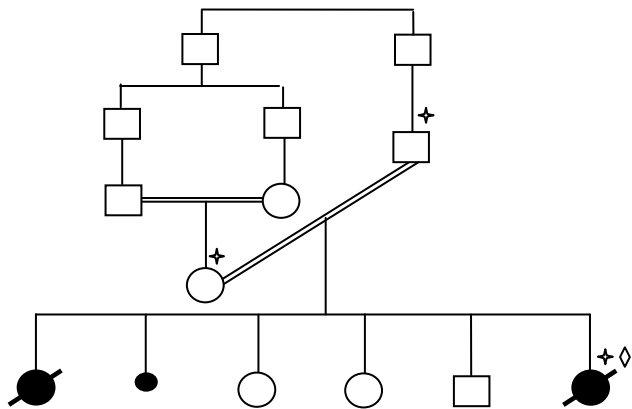

**Family 3 (Egyptian)**

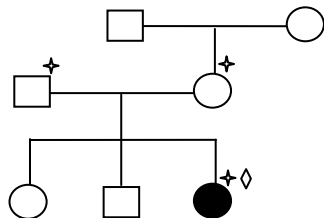

**Family 4 (UAE/Afghani)**

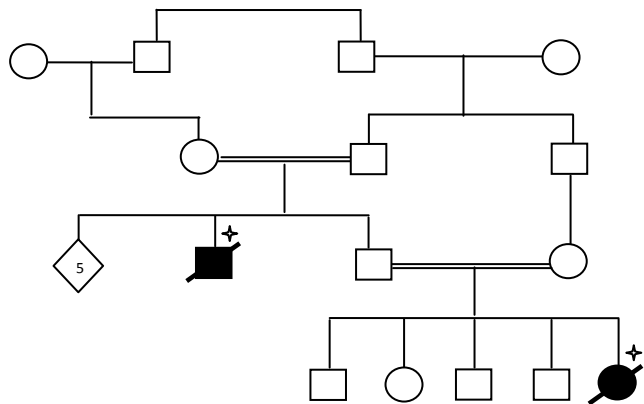

Supplement: MOESM2 [file 9451020]
